# Supplementary material for: An important role of intramolecular free radical reactions in antimalarial activity of artemisinin and its analogs
Source: Royal Society of Chemistry journal article supplement (doi:10.1039/c0ob01150a), 2011-01-01
Supplement: c0ob01150a.pdf [file c0ob01150a.pdf]

## An important role of intramolecular free radical reactions in antimalarial activity of artemisinin and its analogs

**Evgeny Denisov**

Institute of Problems of Chemical Physics RAS, Chernogolovka, Moscow Region, 142432, Russia, e-mail: det@icp.ac.ru

Objects of study:

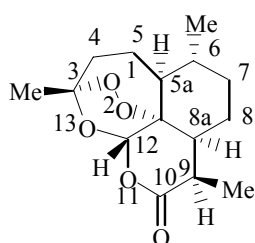

**1**

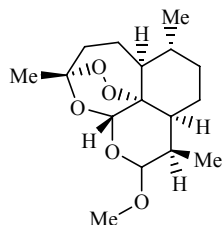

**2**

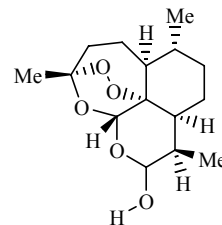

**3**

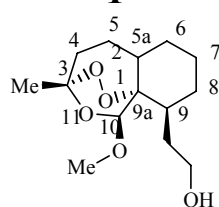

**4**

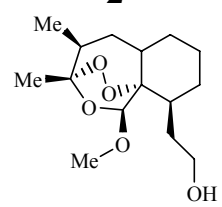

**5**

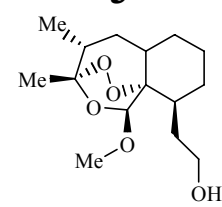

**6**

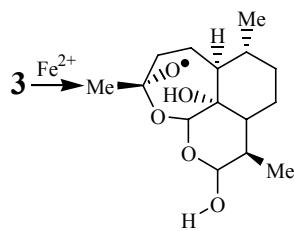

**48**

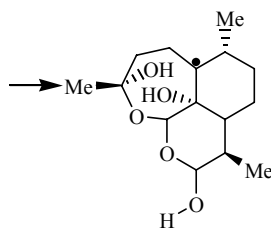

**49**

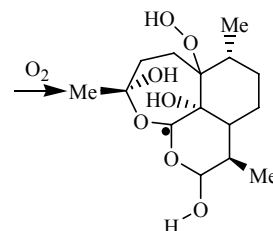

**50**

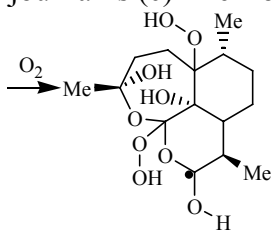

51

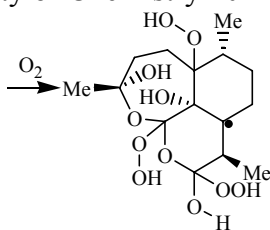

52

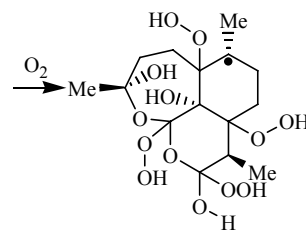

53

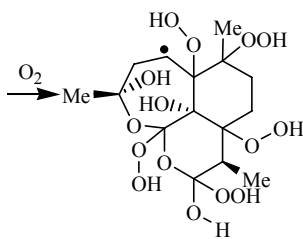

54

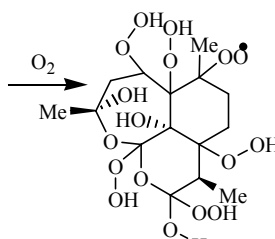

55

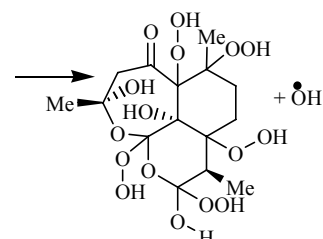

56

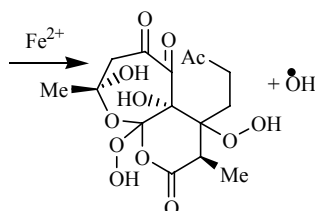

57

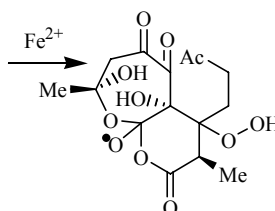

58

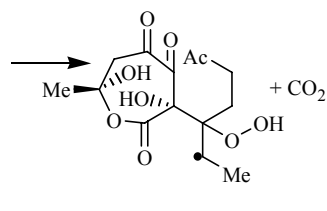

59

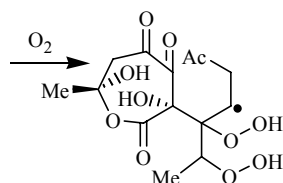

60

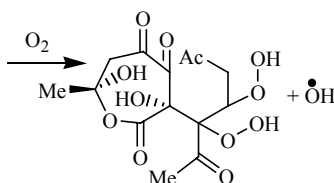

61

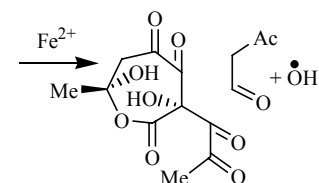

62

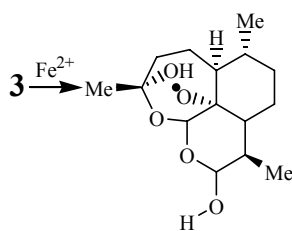

63

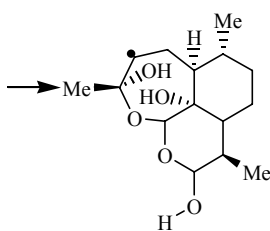

64

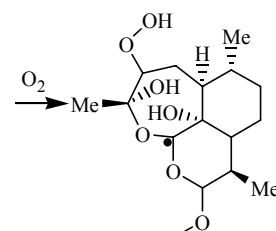

65

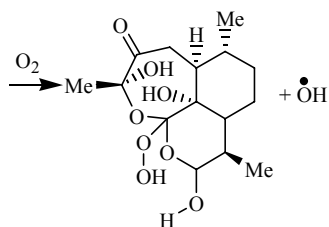

66

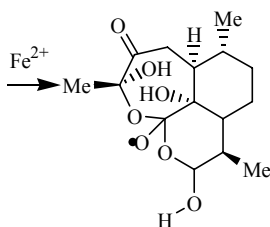

67

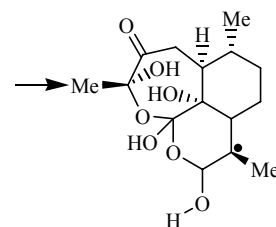

68

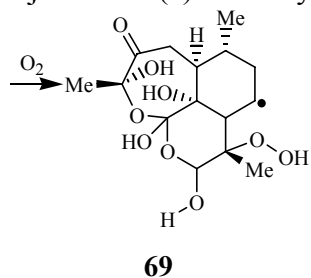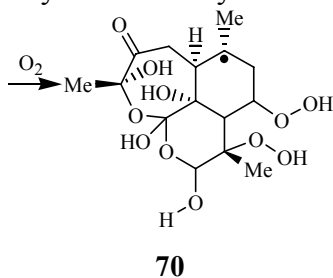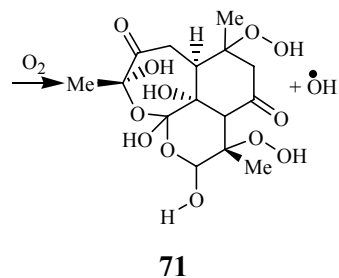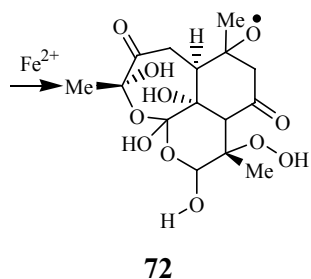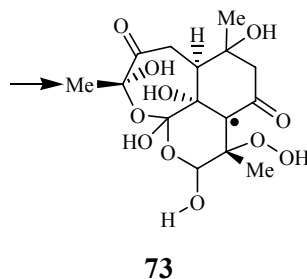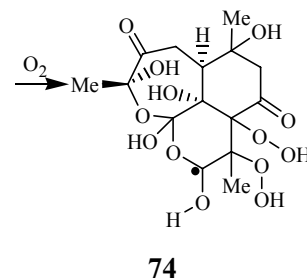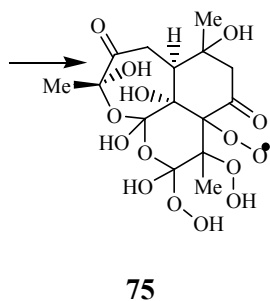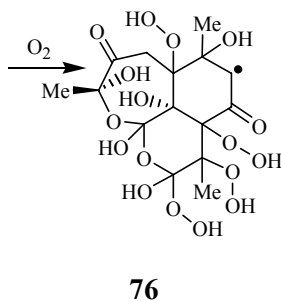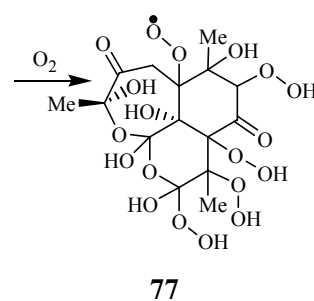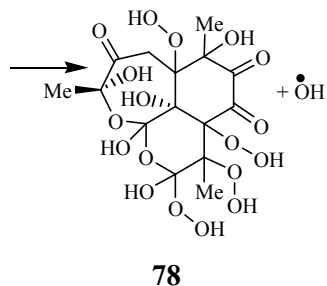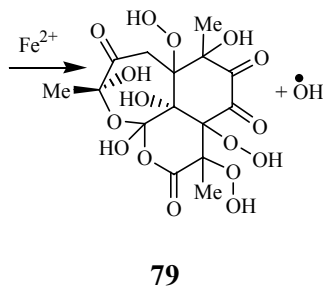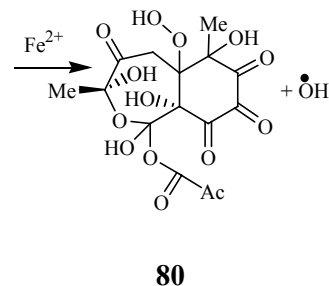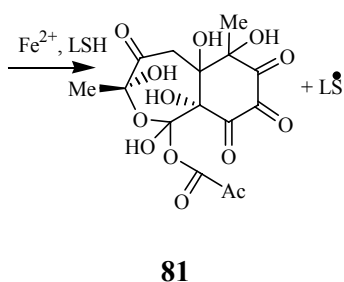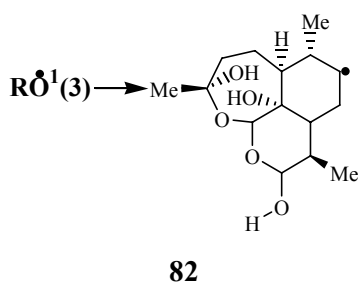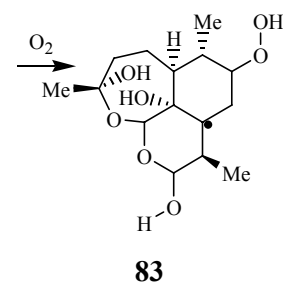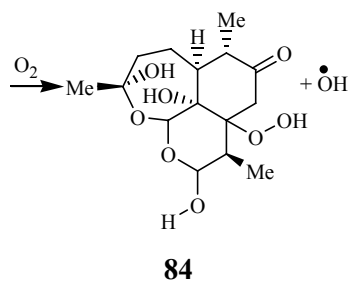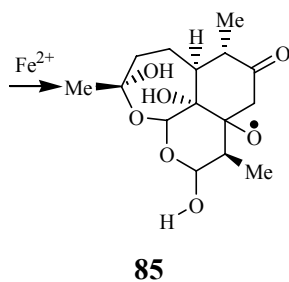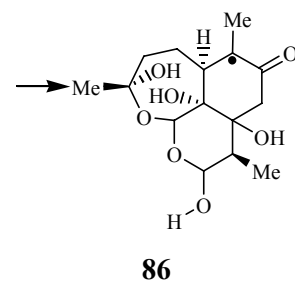

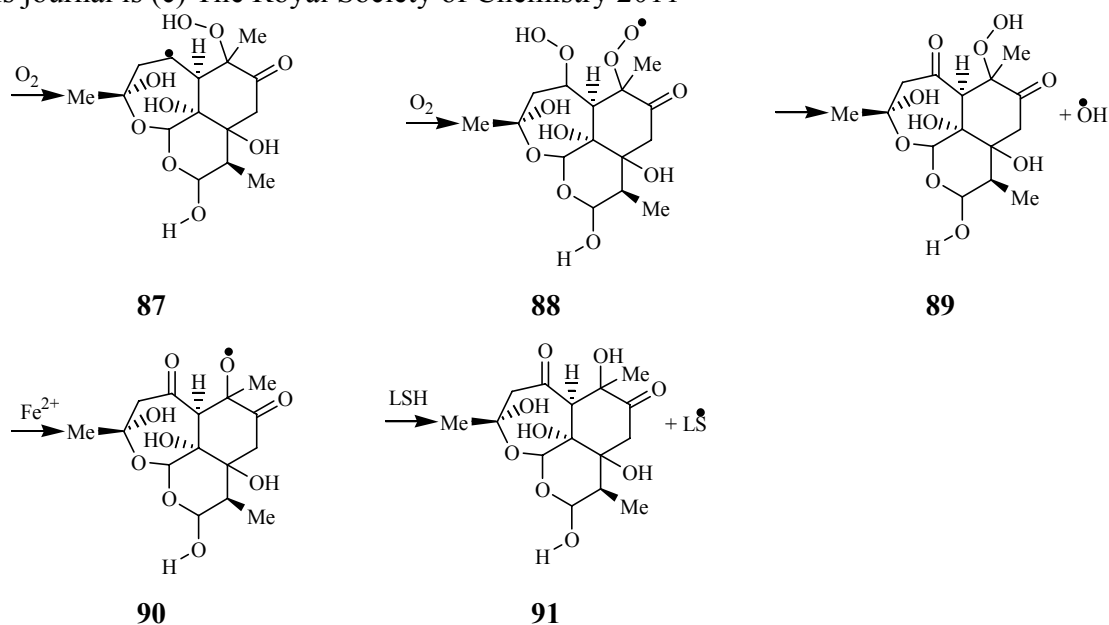

**Scheme 2.** Stages of the intramolecular oxidation of compound **3**. Kinetic characteristics ( $\Delta H$ ,  $E$ ,  $k$ ) of elementary steps of intramolecular oxidation of compound **3** are given in Table 6.

As in the case of compound **2**, free radical  $\text{RO}^{\bullet 1}(\mathbf{3})$  is isomerized in parallel to alkyl radicals  $\text{R}^{\bullet 4}(\mathbf{3})$  and  $\text{R}^{\bullet 7}(\mathbf{3})$  with the ratio of rate constants 2:1. The oxidation and destruction of  $\text{R}^{\bullet 4}(\mathbf{3})$  produces three hydroxy radicals and one thiyl radical, and the oxidation of  $\text{R}^{\bullet 7}(\mathbf{3})$  produces two hydroxy radicals and one  $\text{LS}^{\bullet}$  radical. Radical  $\text{RO}^{\bullet 2}$  is generated due to the oxidation of six hydroxy radicals. The total yield of radicals per molecule of **3** is equal to 4.33 hydroxy radicals (that is more than **1** !) and 0.5  $\text{LS}^{\bullet}$  radical.

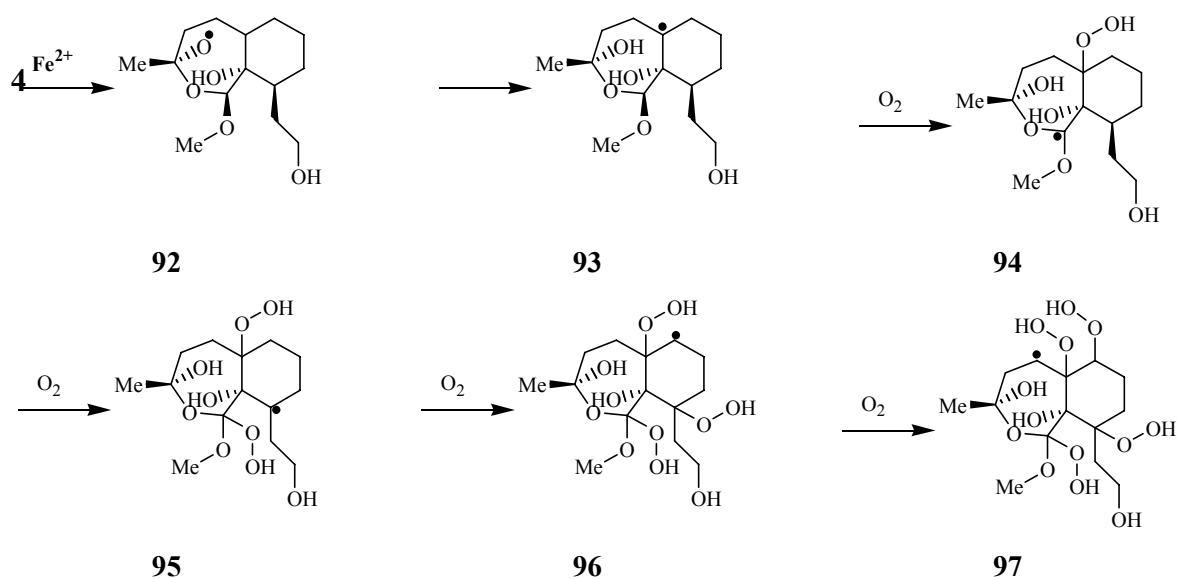

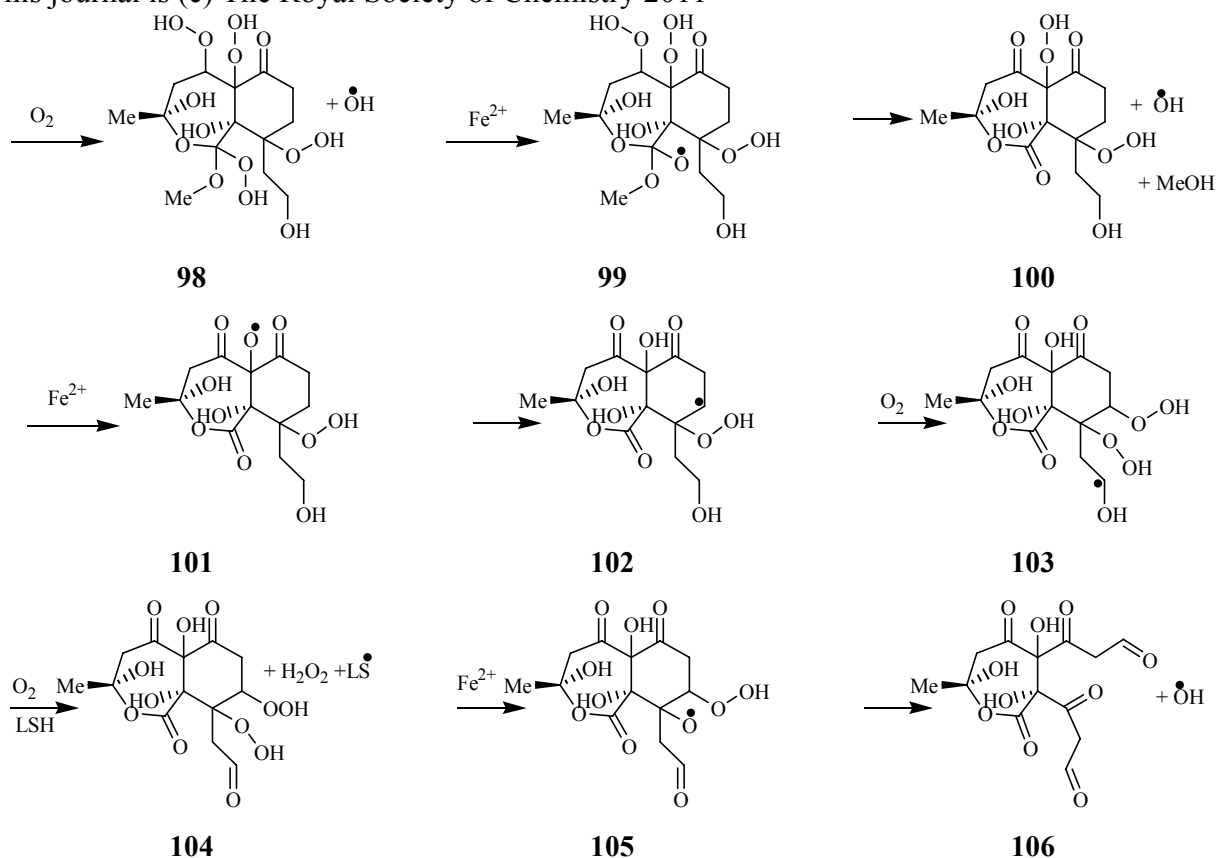

**Scheme 3.** Stages of the intramolecular oxidation of radical  $RO_2^\bullet$  of compound **4**. Kinetic characteristics ( $\Delta H$ ,  $E$ ,  $k$ ) of elementary steps of the intramolecular oxidation of compound **4** are given in Table 6.

It is seen that the intramolecular oxidation of radical  $RO_2^\bullet$  (**4**) proceeds *via* a line of consecutive reactions and generates, as a result, three  $HO^\bullet$  radicals and one  $LS^\bullet$  radical. The same cascade of free radical reactions proceeds in the case of intramolecular transformations of radicals  $RO_2^\bullet$  (**5**) and  $RO_2^\bullet$  (**6**).

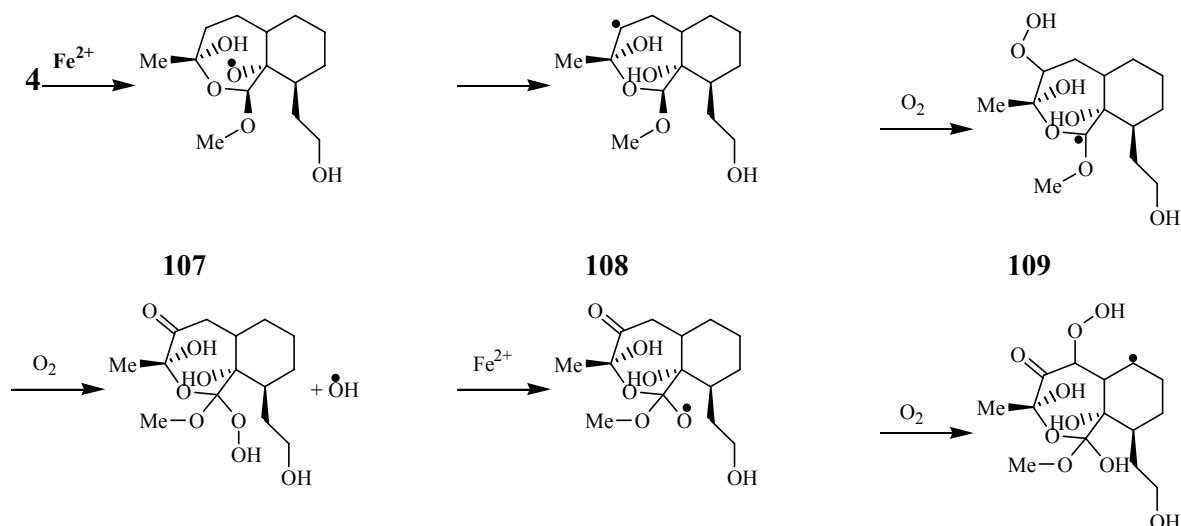

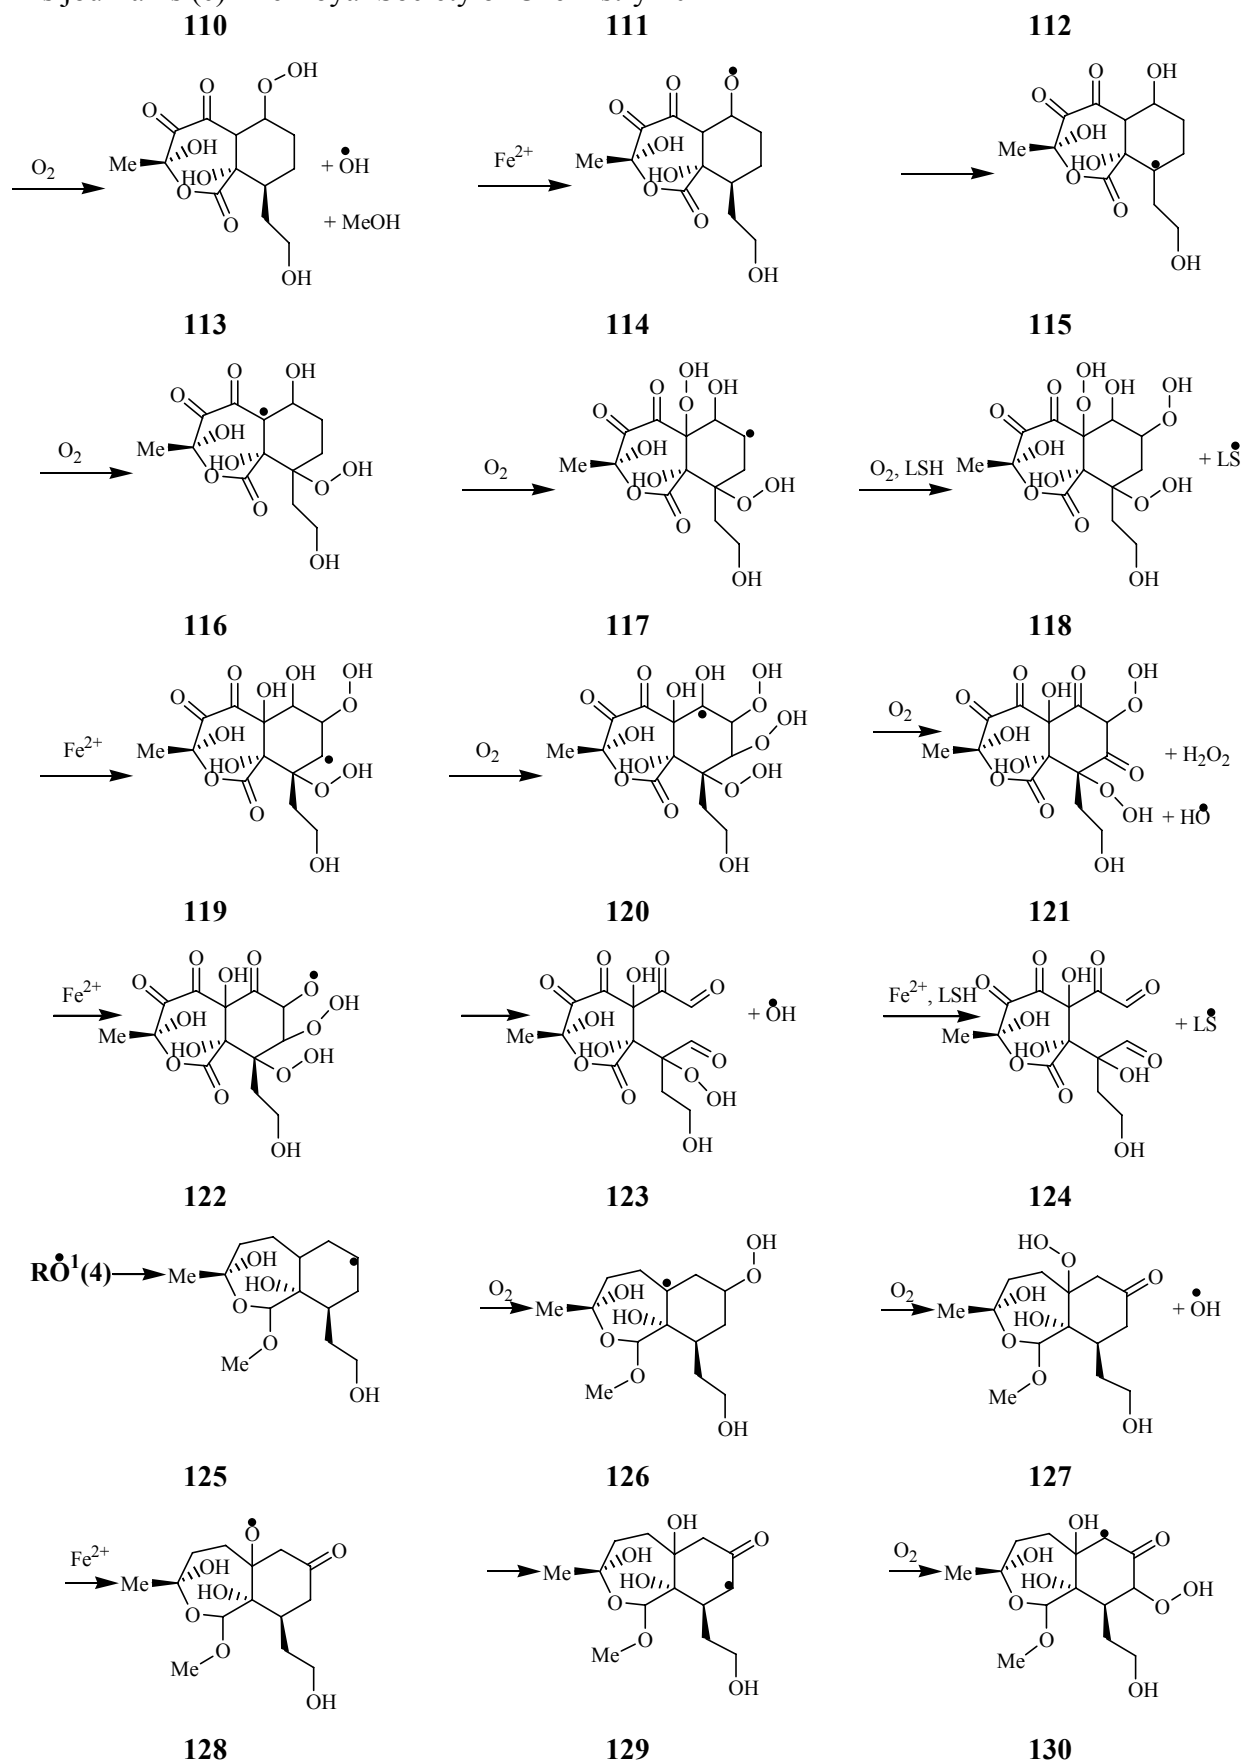

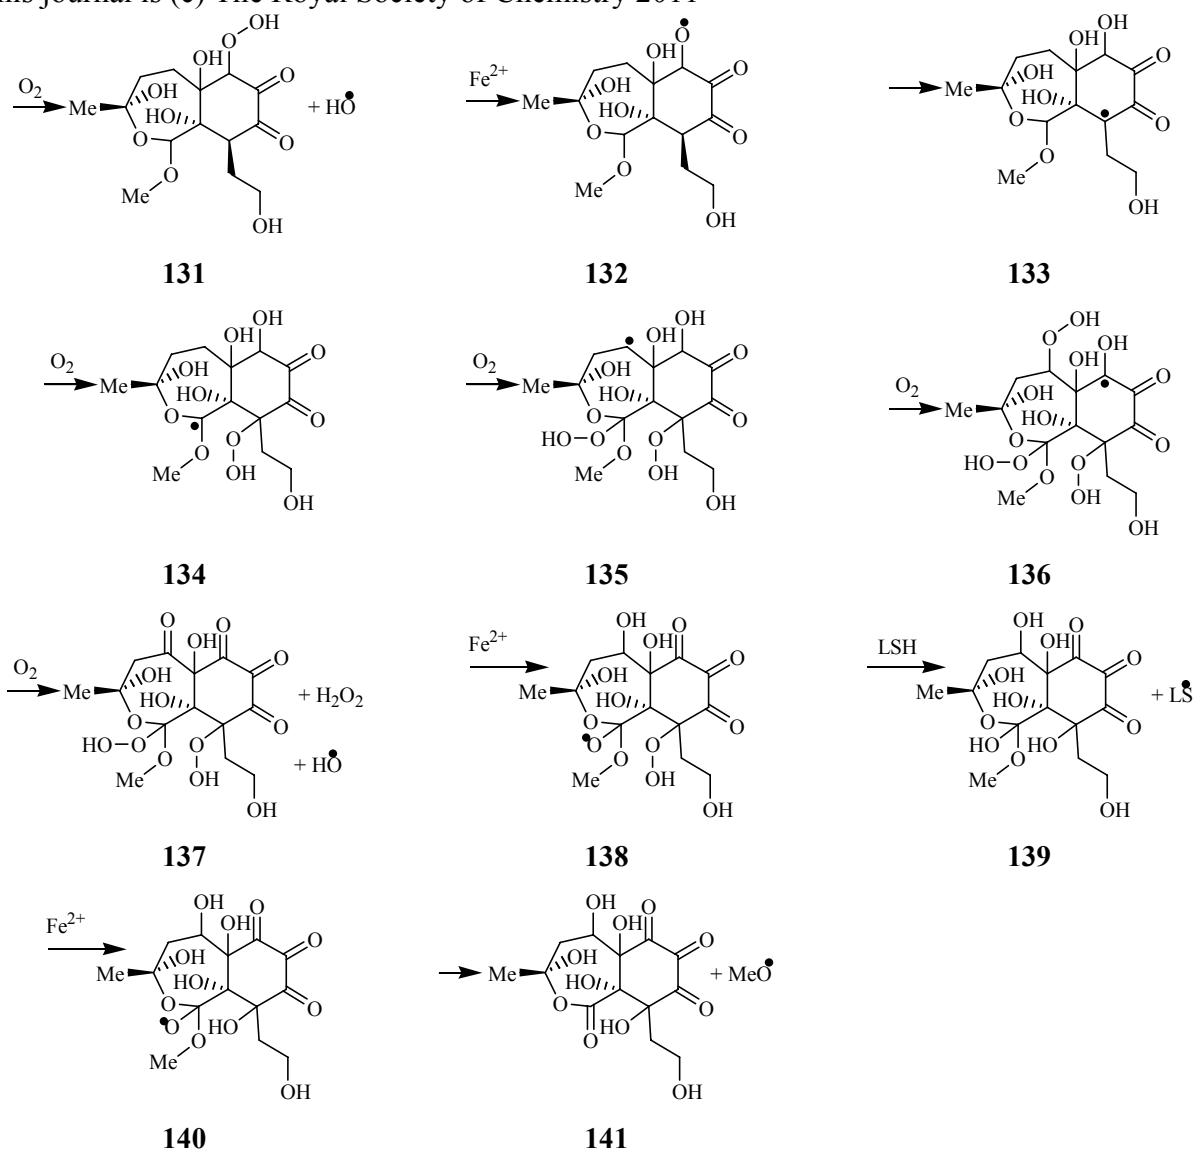

**Scheme 4** Stages of the intramolecular oxidation of radical  $RO^{1\bullet}(4)$ . Kinetic characteristics ( $\Delta H$ ,  $E$ ,  $k$ ) of elementary steps of the intramolecular oxidation of compound **5** are given in Table 6.

The formed methoxy radical reacts preferentially with LSH forming  $LS^{\bullet}$  radical. So, the final yield of free radicals per radical  $RO^{1\bullet}(4)$  is as follows: 3  $HO^{\bullet}$  and 2  $LS^{\bullet}$ . The total yield of free radicals *via* oxidation of compound **4** is 3  $HO^{\bullet}$  + 1.5  $LS^{\bullet}$ .

The introduction of the methyl group in position 4 in such a way that the  $C^4-H$  bond is available for  $RO^{1\bullet}$  intramolecular attack of compound **3** changes the situation dramatically (see Scheme 5).

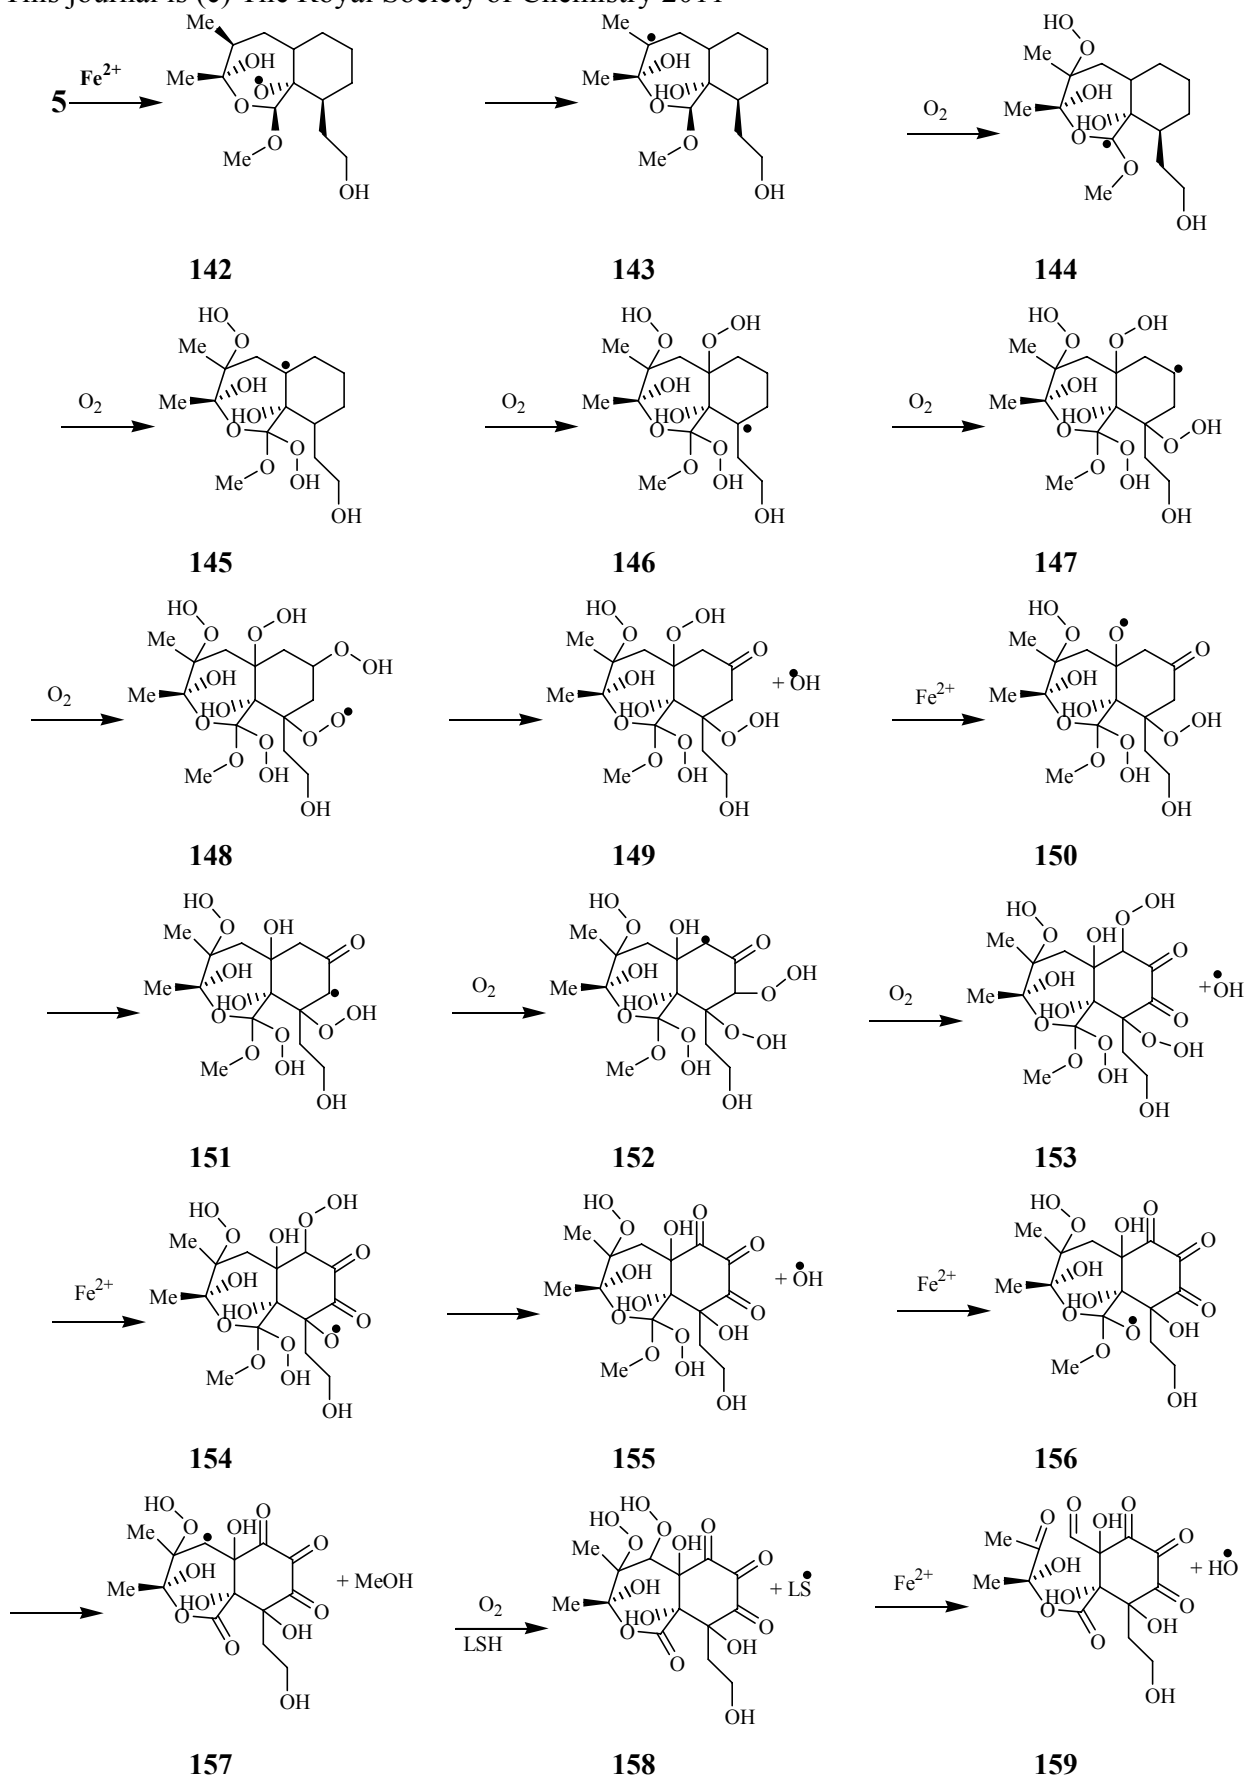

**Scheme 5** Stages of the intramolecular oxidation of radical  $\text{RO}^\bullet$  (**5**). Kinetic characteristics ( $\Delta H$ ,  $E$ ,  $k$ ) of elementary steps of the intramolecular oxidation of compound **5** are given in Table 6.



The methyl group decreases the bond dissociation energy of the adjacent C<sup>4</sup>-H bond, and practically all RO<sup>1•</sup>(**5**) radicals are transformed into radical R<sup>4•</sup>(**5**). The latter is oxidized with the generation of four hydroxyls and one thiyl radical. The total yield of HO<sup>•</sup> radicals is as much as 3.75 HO<sup>•</sup> + 1.5 LS<sup>•</sup>, which is higher than that for **1**! This is in agreement with the antimalarial activity of **5**, which is twice as large as that of **1**.<sup>24</sup>

The change in methyl group orientation at the C<sup>4</sup> atom affects very strongly the antimalarial activity of compound **6**.<sup>24</sup> In this compound, the C<sup>4</sup>-H bond cannot be attacked by RO<sup>1•</sup> radical, and the oxidation proceeds in another way (see Scheme 6). As a result, the oxidation of RO<sup>1•</sup> radical generates only two hydroxy and two LS<sup>•</sup> radicals. The total yield of HO<sup>•</sup> radicals is equal to 2.5 HO<sup>•</sup> and that of thiyl radicals is 1.5.

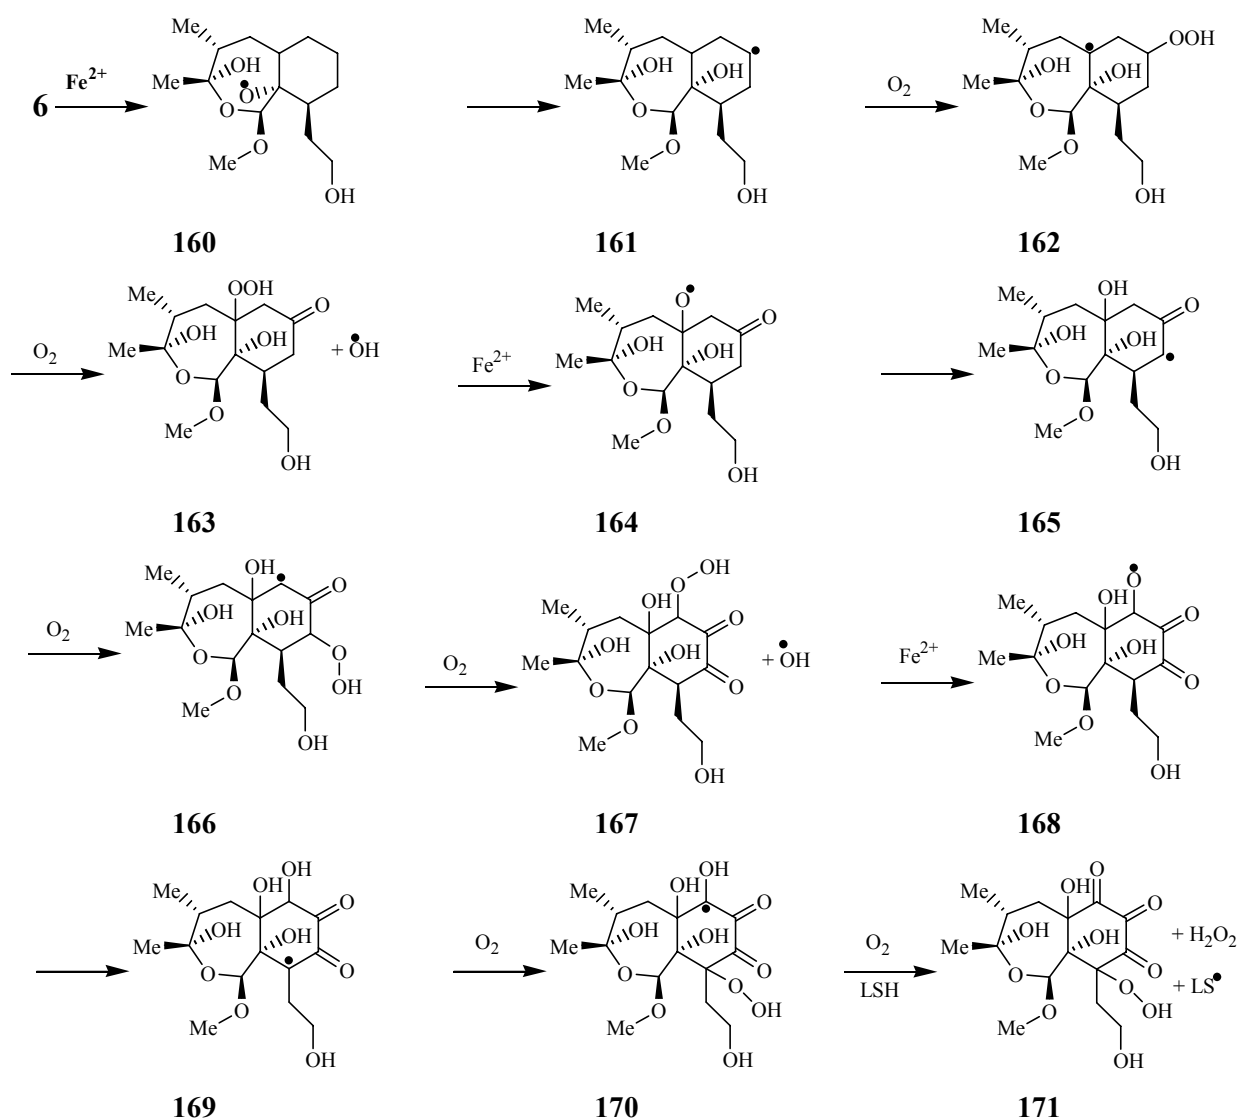

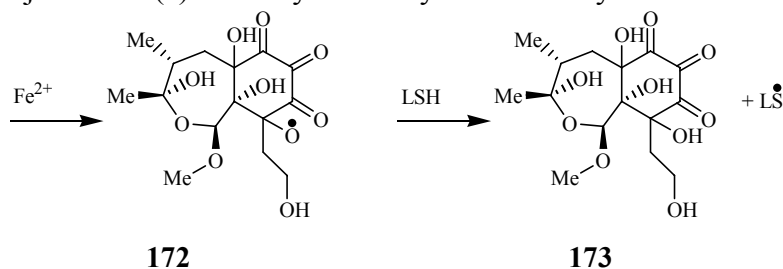

**Scheme 6** Stages of the intramolecular oxidation of radical  $\text{RO}^1\bullet$ (**6**). Kinetic characteristics ( $\Delta H$ ,  $E$ ,  $k$ ) of elementary steps of the intramolecular oxidation of compound **6** are given in Table 6.

**Table 6.** Kinetic characteristics ( $\Delta H$ ,  $E$ ,  $k$ ) of elementary steps of the intramolecular oxidation of compounds 3-6

| Reaction                                                                                                                   | $\Delta H$ (kJ mol <sup>-1</sup> ) | $E$ (kJ mol <sup>-1</sup> ) | $k$ (310 K) (s <sup>-1</sup> ) |
|----------------------------------------------------------------------------------------------------------------------------|------------------------------------|-----------------------------|--------------------------------|
| <b>48</b> → <b>49</b> , <b>92</b> → <b>93</b> , <b>142</b> → <b>143</b>                                                    | -48.5                              | 17.0                        | $5.46 \times 10^9$             |
| <b>49</b> → <b>50</b> , <b>50</b> → <b>51</b> , <b>73</b> → <b>74</b>                                                      | 19.7                               | 44.5                        | $1.74 \times 10^5$             |
| <b>51</b> → <b>52</b>                                                                                                      | 29.2                               | 49.5                        | $2.51 \times 10^4$             |
| <b>52</b> → <b>53</b> , <b>145</b> → <b>146</b>                                                                            | 36.9                               | 54.6                        | $3.47 \times 10^3$             |
| <b>53</b> → <b>54</b> , <b>86</b> → <b>87</b>                                                                              | 45.3                               | 57.4                        | $1.22 \times 10^3$             |
| <b>54</b> → <b>55</b> , <b>74</b> → <b>75</b> , <b>76</b> → <b>77</b> , <b>87</b> → <b>88</b> ,<br><b>147</b> → <b>148</b> | -6.9                               | 19.8                        | $4.15 \times 10^6$             |
| <b>55</b> → <b>56</b> , <b>64</b> → <b>65</b> , <b>65</b> → <b>66</b> , <b>88</b> → <b>89</b> ,<br><b>108</b> → <b>109</b> | 12.5                               | 42.7                        | $3.51 \times 10^5$             |
| <b>59</b> → <b>60</b> , <b>165</b> → <b>166</b>                                                                            | 43.3                               | 56.3                        | $1.80 \times 10^3$             |
| <b>60</b> → <b>61</b> , <b>120</b> → <b>121</b>                                                                            | 13.5                               | 41.5                        | $2.03 \times 10^2$             |
| <b>63</b> → <b>64</b> , <b>107</b> → <b>108</b> , <b>156</b> → <b>157</b> ,                                                | -34.6                              | 21.8                        | $8.51 \times 10^8$             |
| <b>67</b> → <b>68</b> , <b>85</b> → <b>86</b> , <b>114</b> → <b>115</b> ,                                                  | -43.0                              | 18.4                        | $3.17 \times 10^9$             |
| <b>128</b> → <b>129</b> , <b>132</b> → <b>133</b>                                                                          |                                    |                             |                                |
| <b>68</b> → <b>69</b> , <b>95</b> → <b>96</b> , <b>146</b> → <b>147</b>                                                    | 50.2                               | 60.0                        | $4.27 \times 10^2$             |
| <b>69</b> → <b>70</b>                                                                                                      | 30.0                               | 49.4                        | $2.61 \times 10^4$             |
| <b>70</b> → <b>71</b> , <b>77</b> → <b>78</b> , <b>83</b> → <b>84</b> , <b>113</b> → <b>114</b> ,                          | 17.2                               | 43.2                        | $2.88 \times 10^5$             |
| <b>126</b> → <b>127</b> , <b>148</b> → <b>149</b> , <b>162</b> → <b>163</b>                                                |                                    |                             |                                |
| <b>72</b> → <b>73</b> , <b>168</b> → <b>169</b>                                                                            | -53.2                              | 14.9                        | $1.23 \times 10^{10}$          |
| <b>75</b> → <b>76</b>                                                                                                      | 49.5                               | 57.7                        | $1.04 \times 10^3$             |
| <b>80</b> → <b>81</b> , <b>80</b> → <b>81</b> , <b>90</b> → <b>91</b> , <b>138</b> → <b>139</b> ,                          | -78.5                              | 5.8                         | $2.06 \times 10^6$             |

170 → 171, 172 → 173

|                                                                           |       |      |                       |
|---------------------------------------------------------------------------|-------|------|-----------------------|
| 4 → 125, 3 → 82, 101 → 102, 111 → 112,<br>124 → 125, 128 → 129, 160 → 161 | -29.7 | 23.6 | $4.26 \times 10^8$    |
| 82 → 83                                                                   | 22.1  | 45.7 | $1.10 \times 10^5$    |
| 93 → 94, 133 → 134, 143 → 144                                             | 19.5  | 44.3 | $1.79 \times 10^5$    |
| 94 → 95, 165 → 166                                                        | 32.6  | 50.7 | $1.54 \times 10^4$    |
| 96 → 97                                                                   | 38.4  | 53.7 | $4.95 \times 10^3$    |
| 97 → 98                                                                   | 10.3  | 40.0 | $1.00 \times 10^6$    |
| 99 → 100                                                                  | -67.6 | 10.3 | $7.35 \times 10^{10}$ |
| 102 → 103                                                                 | 34.0  | 53.0 | $4.00 \times 10^2$    |
| 103 → 104                                                                 | -2.1  | 31.0 | $1.20 \times 10^2$    |
| 109 → 110                                                                 | 8.0   | 40.6 | $7.93 \times 10^5$    |
| 112 → 113                                                                 | -9.3  | 31.5 | $2.48 \times 10^7$    |
| 115 → 116                                                                 | 26.7  | 47.8 | $4.85 \times 10^4$    |
| 116 → 117                                                                 | 39.0  | 54.0 | $4.37 \times 10^3$    |
| 117 → 118, 157 → 158                                                      | -5.5  | 29.5 | $5.35 \times 10^2$    |
| 119 → 120, 135 → 136                                                      | 22.9  | 46.0 | $7.93 \times 10^5$    |
| 123 → 124                                                                 | -71.9 | 1.5  | $1.12 \times 10^7$    |
| 129 → 130, 151 → 152                                                      | 28.6  | 48.7 | $3.36 \times 10^4$    |
| 130 → 131                                                                 | 2.5   | 36.5 | $3.89 \times 10^6$    |
| 134 → 135                                                                 | 41.0  | 56.6 | $1.59 \times 10^3$    |
| 136 → 137                                                                 | 8.8   | 41.0 | $6.79 \times 10^5$    |
| 144 → 145                                                                 | 27.1  | 48.0 | $1.49 \times 10^8$    |
| 150 → 151, 164 → 165                                                      | -44.4 | 18.2 | $3.41 \times 10^9$    |
| 152 → 153                                                                 | -8.2  | 32.0 | $2.23 \times 10^7$    |
| 154 → 155                                                                 | -77.4 | 3.3  | $2.78 \times 10^{12}$ |
| 161 → 162, 125 → 126                                                      | 24.5  | 46.7 | $7.32 \times 10^4$    |
| 166 → 167                                                                 | -4.4  | 33.6 | $2.82 \times 10^7$    |
| 169 → 170                                                                 | 15.2  | 43.8 | $2.25 \times 10^5$    |

---
